# Supplementary material
Source: PubMed Central journal article supplement (PMC6748813)
Supplement: djy209_supplementary_data.pdf [file djy209_supplementary_data.pdf]

## **Supplementary Material**

### **Pregnancy-Associated Plasma Protein-A (PAPP-A) in Ewing sarcoma:**

#### **Role in Tumor Growth and Immune Evasion**

Sabine Heitzeneder, Elena Sotillo, Jack F. Shern, Sivasish Sindiri, Peng Xu, Robert Jones, Michael Pollak, Pernille R. Noer, Julie Lorette, Ladan Fazli, Anya Alag, Paul Meltzer, Ching Lau, Cheryl A. Conover, Claus Oxvig, Poul H. Sorensen, John M. Maris, Javed Khan, and Crystal L. Mackall

## Supplementary Methods

### **Tissue processing and RNA sequencing of pediatric solid tumors and normal tissue samples and differential gene expression analysis in Ewing sarcoma compared to normal tissues**

PolyA selected RNA libraries were prepared for sequenced on the Illumina HiSeq2000 using TruSeq v3 chemistry according to the manufacturer's protocol (Illumina). RNA sequencing was performed with an average yield of 18.6 Gb per sample. Raw reads were mapped to UCSC human reference genome (hg19) using STAR/2.4.0k and subsequently genes and transcripts expression was quantified using edgeR and ENSEMBL gene annotation. The transcripts per million (TPM) gene expression values of all genes interrogated (n= 18539) on tumors and a panel of NCI in-house generated normal tissue samples was log transformed and standardized (Z-score) to calculate the difference in expression distribution for any gene between the two groups. EdgeR was used [1] to generate a list of differentially expressed genes between the two groups (n= 5890).

LogFC (fold-change) > 1 and  $p < 0.01$  was used to filter for genes significantly overexpressed on Ewing sarcoma (n=584). Genes were further filtered by their cellular compartment annotation. Therefore, as part of the St. Baldrick's/SU2C consortium, a database was generated to annotate gene products that were most likely to be expressed on the cell surface. Eleven annotation datasets were compiled from commercially generated databases (Compendia, n=5), from the academic resources (Mike Jensen Lab, Seattle Children's, n=4), and from the public databases (Gene Ontology – Intrinsic or Extrinsic plasma membrane, n=2). In total, 341 genes of the 584 genes significantly overexpressed in Ewing sarcoma carried evidence of membrane annotation in at least 6 out of the 11 datasets (evidence filter  $\geq 6$ ). The likelihood of a gene product's association with the cell membrane was assumed to increase with the number of datasets it was observed in, whereby a score of 11 indicated those genes with the strongest evidence of being on the cell

surface. Overexpression of *PAPPA* on EWS samples was defined by values above the upper 95% confidence interval of the mean of the normal samples (upper 95% CI of mean =1.552, n=42).

For bioinformatics analysis of osteosarcoma samples, Salmon, a lightweight method for gene expression quantification (doi: 10.1038/nmeth.4197, version 0.8.1) used unstranded paired-end fastq files to produce gene-summarized transcript-per-million (TPM) values for the Gencode version 25 gene models. Gene expression values for *PAPPA* according to the Human Protein Atlas were queried from Uhlen et. al [2].

### **Cells and culture conditions**

Ewings sarcoma cell lines used in this study included NCI-EWS-925, NCI-EWS-95, NCI-EWS-021, NCI-EWS-981 and NCI-EWS-022, were generated after Informed Consent from patients treated at Pediatric Oncology Branch, Center for Cancer Research, NCI (Bethesda, MD) between 1997 and 2002 and previously reported cell lines TC71 and 5838 [3]. EW8, TC32, RD-ES, 6647 and CHLA258 were kindly provided by L. Helman (NCI, Bethesda) and A673 and SKNMC by A. Sweet-Codero (Stanford, Palo Alto). The neuroblastoma cell line Kelly was provided by C. Thiele (NCI, NIH). 293T cells were obtained from the American Type Culture Collection (ATCC, Manassas). The 293T cell line was cultured in DMEM (Life Technologies). All other cell lines were cultured in RPMI-1640. DMEM and RPMI-1640 were supplemented with 10% heat-inactivated FBS (Gibco, Life Technologies), 10mM HEPES, 100U/mL penicillin, 100 µg/ml streptomycin and 2mM L-glutamine (Gibco, Life technologies). All cell lines used were fingerprinted annually and regularly tested negative for Mycoplasma by luminescence (MycoAlert™ Mycoplasma Detection Kit, Lonza).

## **Flow Cytometry**

Flow Cytometry experiments were carried out according to standard protocols. In brief, data was collected with an LSR Fortessa or LSR Fortessa X-20 (BD Bioscience) and analyzed using the FlowJo software. Cells were washed twice with PBS and labelled with fixable Viability Dye eFluor® 450 (ebioscience #65-0863-14) at  $1 \times 10^6$  cells/mL in PBS, followed by two washes with FACS buffer (PBS supplemented with 2% FBS and 0.4% 0.5M EDTA). PAPP-A antigen expression was assessed by staining of  $0.5 \times 10^6$  cells with unconjugated monoclonal anti-PAPP-A antibody (#ABS 006-01-02, Thermofisher) which exhibits specificity for PAPP-A membrane immunoreactivity of placental tissue according to the HPA ([www.humanproteinatlas.org](http://www.humanproteinatlas.org)) or isotype control antibody (#400102 MOPC-21 Mouse IgG1,  $\kappa$ ) for 30 min on ice in the dark and detection with the secondary goat-anti mouse IgG Alexa Fluor® 647 (#405322, Biolegend). Cells were washed 3 times with FACS buffer after each incubation step. Cells were gated on viable cells and singlet discrimination (FSC-A/FSC-H) was performed before assessment of antigen expression. Mean fluorescent intensity (MFI) was calculated by subtraction of isotype geometric means from samples run in triplicates.

## **Enzyme Linked Immunosorbent Assay**

All ELISA kits used for analysis of cell culture supernatants as well as patient serum and plasma samples were obtained from Ansh Labs (Webster, TX). The following ELISA kits were used in this study: picoPAPP-A (AL-101), bioactive IGF-I (AL-122), IGF-I (AL-121), total IGFBP-4 (AL-126) and intact IGFBP-4 (AL-128). Assays were performed according to the manufacturer's protocol and levels were calculated using OD values measured in triplicates or quadruplicates for samples and standards at 450nm with background wavelength correction at 630nm. For picoPAPP-A, levels were converted from ng/mL to  $\mu$ IU/mL according to manufacturer's instructions ( $1 \text{ ng/mL} = 2.7 \mu\text{IU/mL}$ ). Cell culture supernatants were analyzed after incubation of  $1 \times 10^5$  cells

for 24 hours at 37°. Serum and Plasma samples from healthy control donors and Ewing sarcoma patients and Non-EWS patients were obtained from the National Institutes of Health Blood Bank (Bethesda, MD) between April and June 2015 after informed consent on National Institutes of Health Institutional Review Board–approved protocols. Diagnoses of Non-EWS patients were Rhabdomyosarcoma (n=6), Desmoplastic Small Round Cell Tumor (n=3), Osteosarcoma (n=2), Melanoma (n=1) and Synovial Cell Sarcoma (n=1). Samples were stored at -80°C prior to assessment of PAPP-A levels.

### **Tissue microarray**

TMA staining was performed at the BC Cancer Agency, Vancouver, Canada and analyzed according to standard methodology. To semi-quantitatively evaluate protein expression in TMA cores, H-scores were calculated adding the sum of the percentage of positive cells (0-100%) and the staining intensity (range 0-3+) according to the formula [1x (% of cells 1+) + 2x (% of cells 2+) + 3x (% of cells 3+)]. Normal tissue TMA was derived from the CHTN (Cooperative Human Tissue Network), the small Round blue cell TMA from CHOP (Children’s Hospital of Philadelphia, PA), the osteosarcoma TMA from Nationwide Children’s Hospital (OH) and the Ewing sarcoma from the COG (Children’s Oncology Group, PA). All IHC staining for PAPP-A (ABS 006-01, Thermo Fisher) was performed on the Ventana Discovery XT automated stainer. After standard antigen retrieval using CC1 (Cell Conditioning 1, Ventana, AZ), primary antibody incubation was performed for 1 hour at room temperature at a dilution of 1:200. For dilution SignalStain enhancer (#8112 Cell signaling Technology, MA) was used. Incubation with Ultramap Ms HRP secondary antibody for 16 min was followed by by Chromomap DAB detection. A light hematoxylin counterstain was applied prior to coverslipping.

## **CRISPR/Cas9 gene editing**

Reagents used for gene editing of the *PAPPA* locus were obtained from Genecopoeia (Rockville, MD). Expression of Cas9 was achieved by lentiviral transduction (#CP-LvC9NU-01, Genecopoeia, Rockville, MD) of  $0.5 \times 10^6$  cells in the presence of  $10 \mu\text{g/mL}$  of protamine sulfate and subsequent antibiotic selection with neomycin ( $500 \mu\text{g/mL}$  for EW8). Individual delivery of three different sgRNA's and expression of an mCherry reporter was done by a second lentiviral transduction (#HCP212189-LvSG02-3-B, Genecopoeia, Rockville, MD). After 48 hours, cells were sorted for expression of the reporter and underwent single cell cloning by serial dilution into 96-well plates. Whole wells were consecutively imaged for formation of colonies derived by single cells using the IncuCyte Live Cell Analysis System (IncuCyte ZOOM, Essen Bioscience) at a 4x objective. Efficient PAPP-A knockout was confirmed by ELISA of cell culture supernatants after incubation of  $1 \times 10^5$  cells for 24 hours at  $37^\circ$ .

## **In vitro proliferation assay and IncuCyte experiments**

Cells ( $0.05 \times 10^6$ ) were plated and after 1 day cultured for 72 hrs in the presence of monoclonal anti-PAPP-A antibody 1/41 [Ansh Laboratories (Webster, TX) or IgG2a control mAB (#BE0085, BioXCell, West Lebanon, NH) at a concentration of  $20 \mu\text{g/mL}$ . After 72 hrs, cells were counted with a hemocytometer. All measurements were performed in quadruplicate, and mean values are presented. Experiments determining cell growth were carried out using the IncuCyte Live Cell Analysis System (IncuCyte ZOOM, Essen Bioscience). Cells were plated in triplicates at  $10 \times 10^3$  cells/well in 96-well plates (day 0) and allowed to adhere. Confluency of cells was monitored starting on day 1, every 2-4 hours over the course of a total of 90-140 hours in the presence of monoclonal anti-PAPP-A antibody 1/41 [Ansh Laboratories (Webster, TX) or IgG2a control mAB (#BE0085, BioXCell, West Lebanon, NH), anti-IGF1R h7C10 (Merck, Kenilworth, NJ) or human IgG1 Isotype CTRL (#C0001, Crown Bioscience, Santa Clara, CA) at a concentration of  $10 \mu\text{g/mL}$ .

for proliferation assays and in the presence or absence of 60 ng/mL native soluble PAPP-A (#AG-301-BP040, AnshLabs TX, purified heterotetrameric PAPP-A from pregnancy serum, >80% purity) for rescue experiments. Means of percentage of phase object confluency was graphed over time. Alloreactivity of activated T-cells against PAPP.A.KO and CTRL clones was assessed by measuring Average Green Object Mean Intensity (GCU) on GFP-transduced cell lines. Isolated T-cells from normal blood donors were activated with CD3/CD28 Dynabeads (Dynabeads Human T-activator CD3/CD28, Thermofisher, #Cat.NO 111.32D) and cultured in AIM-V media (Thermofisher, #12055083), supplemented with 5% heat-inactivated FBS (Gibco, Life Technologies), 10mM HEPES, 100U/mL penicillin, 100 µg/ml streptomycin and 2mM L-glutamine (Gibco, Life technologies) and 100 IU/mL IL-2. Dynabeads were removed on day 4 after activation. For co-culture experiments day 7 T-cells were used and all cells were cultured in RPMI complete media as described above.

#### **Proteinase cleavage assay of <sup>125</sup>I-labeled IGFBP-5**

SDS-PAGE experiments were carried out as previously described[4]. In brief, cell culture supernatant (24hrs) from EW8.PAPP.A.KO or CTRL cell lines was diluted 2.5x in reaction buffer (50 mM Tris, 100 mM NaCl, 1 mM CaCl<sub>2</sub>, pH 8.0) with either polyclonal rabbit anti PAPP-A (1:200) or irrelevant polyclonal rabbit IgG (rabbit anti-cow serum) (1:450, DAKO). The proteolytic reaction was initiated by adding 10nM radiolabeled IGFBP5 to the reaction mix. Cleavage reactions was stopped at 60 minutes by adding SDS loading buffer supplemented with 25 mM EDTA. Cleaved IGFBP5 was separated from intact by non-reducing SDS-PAGE, and bands were visualized by autoradiography using a storage phosphor screen (GE Healthcare).

## **In vivo experiments**

Male 6-8 weeks old NSG mice were xenografted with  $2 \times 10^6$  EW8 cells in 100  $\mu$ l PBS into the right M. gastrocnemius (4-5 mice/group/experiment). Tumor cells were washed twice with PBS before injection. Mice received weekly intraperitoneal injections with 800  $\mu$ g/mouse PAPP-A mAB 1/41 (AnshLabs, Webster, TX) or IgG2a control mAB (#BE0085, BioXCell, West Lebanon, NH), 333  $\mu$ g/mouse anti-IGF1R h7C10 (Merck, Kenilworth, NJ) or PBS/ human IgG1 Isotype CTRL (#C0001, Crown Bioscience, Santa Clara, CA) or in combination starting at day 3-4 after tumor engraftment. Combined data of n=3 individual experiments is presented (n=14-15 mice/group). Baseline measurement of legs were taken before engraftment and tumor growth was measured two times a week with digital calipers in two dimensions. Maximum tumor size was defined as or exceeding 20mm in its longest dimension. All animal care was in accordance with NIH guidelines.

## **RNAsequencing of PAPP-A targeted knockout clones**

After RNA extraction, cDNA library Generation and bar-coding of samples was done using a KAPA Stranded mRNA-Seq Kit, with KAPA mRNA Capture Beads (#KK8420, Kapa Biosystems). A paired-end pooled high-throughput sequencing run (Illumina NextSeq 2x75 high-output, 400M total reads) was performed at the Stanford Functional Genomics Facility. NextSeq fastq files were aligned onto GRCh38 using STAR aligner (DOI: <https://doi.org/10.1093/bioinformatics/bts635>). RNA counts were generated with HTSeq (DOI: <https://doi.org/10.1093/bioinformatics/btu638>) on Homo\_sapiens.GRCh38.84.gtf. Sample B-H8 was excluded due to loss of gene expression in location (Chr21: 39,387,421-41,778,490) and the samples were divided into two groups, PAPP-A knockout (KO) and control (CTRL). Genes with greater than 10 counts in either all KO or CTRL samples were retained. From this set, genes with greater than FPKM>1 in either all KO or CTRL samples were retained. Differential genes



expression analysis on this set was performed with DESeq2 (DOI: <https://doi.org/10.1186/s13059-014-0550-8>). Genes with adjusted p-value of  $< 0.5$  were retained. The remaining list of 7,457 genes and their FPKM expression values were submitted to the GSEA (<http://software.broadinstitute.org/gsea/msigdb/index.jsp>) website for analysis against the Molecular Signatures Database v5.2.

### **HLA class I expression in EWS cell lines**

EWS cell lines EW8 or TC32 were grown for 4 days in RPMI complete media the presence of 10  $\mu\text{g}/\text{mL}$  of anti-PAPP-A mAB 1/41 and/or anti-IGF1R mAB h7C10 or according isotype control antibodies as described above in six replicates. Media supplemented with antibodies was changed once after 48hrs. Adherent cells were detached using non-enzymatic solutions (Cellstripper #25-056-CI, Corning, NY), and processed for Flow Cytometry as described above. Staining was performed in triplicates with HLA-ABC (#311410, Biolegend, San Diego, CA) or isotype control (#400220, Biolegend, San Diego, CA). Mean fluorescent intensity (MFI) of viable, singlet populations were calculated by subtraction of isotypes from samples. EW8.PAPP-A.KO and CTRL samples were also stained with these antibodies.

### **Gene set enrichment analysis of immune cell infiltration**

Custom GSEA analysis was performed utilizing gene expression signatures for various immune cell types as previously published [5]. To identify gene signatures, that were skewed due to overlapping gene expression by EWS tumors, normalized immune scores for each subset were calculated and analyzed in both cell lines (n=45) and primary tumor samples (n=75). Immune cell gene signatures with  $\geq 5$  genes, in which scores were negative in cell lines were used as a basis for GSEA analysis and included T-cells, B-cells, Tem, Th1, TFH, CD8 T-cells, Cytotoxic cells, NK cells, NKCD56bright, DC, iDC, aDC, Eosinophils, Macrophages, Mast cells and Neutrophils.

## **Statistical methods**

Graphs were generated using GraphPad Prism software version 7.0 and values represent mean  $\pm$  SD (as indicated) of biological replicates unless otherwise stated.

All statistical tests were two-sided and a p-value of  $>0.05$  was considered statistically significant. TPM gene expression values of all genes (n= 18539) in tumors (n=120) and NCI in-house generated normal tissue samples (n=42) were log transformed and standardized (Z-score) to calculate the difference in expression distribution for any gene between the two groups (n= 5890). EdgeR was used to generate a list of differentially expressed genes between the two groups. Differences in PAPP-A levels in patients and HLA-B/HLA-C expression in EWS vs. normal were calculated using a Wilcoxon–Mann–Whitney test. Kaplan-Meier survival curves of vivo experiments were analyzed using log-rank. Deaths of mice occurring before the establishment of tumor were censored from survival analysis. Comparison of tumor growth curves of in vitro and in vivo experiments were calculated using repeated-measures Analysis of variance (Two-way RM-ANOVA). All other experiments were evaluated for statistical significance using a student's t-test. P-values of enrichment analysis were calculated using GSEA software. All figures represent three replicates unless otherwise stated.

## References

1. Robinson, M.D., D.J. McCarthy, and G.K. Smyth, *edgeR: a Bioconductor package for differential expression analysis of digital gene expression data*. Bioinformatics, 2010. **26**(1): p. 139-40.
2. Uhlen, M., et al., *Proteomics. Tissue-based map of the human proteome*. Science, 2015. **347**(6220): p. 1260419.
3. Merchant, M.S., et al., *Potential use of imatinib in Ewing's Sarcoma: evidence for in vitro and in vivo activity*. J Natl Cancer Inst, 2002. **94**(22): p. 1673-9.
4. Kloverpris, S., et al., *Stanniocalcin-1 Potently Inhibits the Proteolytic Activity of the Metalloproteinase Pregnancy-associated Plasma Protein-A*. J Biol Chem, 2015. **290**(36): p. 21915-24.
5. Bindea, G., et al., *Spatiotemporal dynamics of intratumoral immune cells reveal the immune landscape in human cancer*. Immunity, 2013. **39**(4): p. 782-95.
6. Riggi, N., et al., *EWS-FLI1 utilizes divergent chromatin remodeling mechanisms to directly activate or repress enhancer elements in Ewing sarcoma*. Cancer Cell, 2014. **26**(5): p. 668-81.

**Supplementary Table 1. Most differentially expressed cell surface genes in EWS**

| NO | GeneID          | Gene Name      | EXPRESSION (AVG<br>log <sub>2</sub> (TPM+1)) |             | EWS vs. NORMAL         |       |                        |
|----|-----------------|----------------|----------------------------------------------|-------------|------------------------|-------|------------------------|
|    |                 |                | Normal (n=42)                                | EWS (n=120) | P-val (*)              | logFC | FDR                    |
| 1  | ENSG00000171873 | <i>ADRA1D</i>  | 1.734                                        | 6.806       | 4.54x10 <sup>-55</sup> | 5.745 | 3.54x10 <sup>-53</sup> |
| 2  | ENSG00000182752 | <i>PAPPA</i>   | 1.741                                        | 5.729       | 8.31x10 <sup>-42</sup> | 4.600 | 2.48x10 <sup>-40</sup> |
| 3  | ENSG00000221977 | <i>OR4E2</i>   | 0.013                                        | 2.236       | 3.04x10 <sup>-29</sup> | 8.537 | 3.81x10 <sup>-28</sup> |
| 4  | ENSG00000186867 | <i>QRFPR</i>   | 0.730                                        | 5.148       | 4.78x10 <sup>-28</sup> | 7.506 | 5.43x10 <sup>-27</sup> |
| 5  | ENSG00000187323 | <i>DCC</i>     | 0.774                                        | 4.931       | 7.98x10 <sup>-27</sup> | 4.897 | 8.33x10 <sup>-26</sup> |
| 6  | ENSG00000147145 | <i>LPAR4</i>   | 1.196                                        | 3.703       | 6.40x10 <sup>-26</sup> | 3.330 | 6.27x10 <sup>-25</sup> |
| 7  | ENSG00000100593 | <i>ISM2</i>    | 0.464                                        | 3.167       | 3.23x10 <sup>-25</sup> | 4.871 | 2.98x10 <sup>-24</sup> |
| 8  | ENSG00000142513 | <i>ACPT</i>    | 0.547                                        | 2.628       | 3.97x10 <sup>-24</sup> | 3.129 | 3.39x10 <sup>-23</sup> |
| 9  | ENSG00000150551 | <i>LYPD1</i>   | 1.199                                        | 4.718       | 4.74x10 <sup>-23</sup> | 3.875 | 3.74x10 <sup>-22</sup> |
| 10 | ENSG00000188778 | <i>ADRB3</i>   | 0.948                                        | 5.305       | 5.56x10 <sup>-23</sup> | 5.741 | 4.37x10 <sup>-22</sup> |
| 11 | ENSG00000180537 | <i>RNF182</i>  | 1.544                                        | 5.656       | 1.44x10 <sup>-22</sup> | 3.778 | 1.10x10 <sup>-21</sup> |
| 12 | ENSG00000179520 | <i>SLC17A8</i> | 0.459                                        | 4.193       | 1.50x10 <sup>-22</sup> | 8.526 | 1.14x10 <sup>-21</sup> |
| 13 | ENSG00000162631 | <i>NTNG1</i>   | 1.624                                        | 5.127       | 4.39x10 <sup>-22</sup> | 3.691 | 3.22x10 <sup>-21</sup> |
| 14 | ENSG00000143590 | <i>EFNA3</i>   | 1.772                                        | 4.141       | 6.80x10 <sup>-22</sup> | 2.462 | 4.93x10 <sup>-21</sup> |
| 15 | ENSG00000102290 | <i>PCDH11X</i> | 0.463                                        | 3.370       | 1.70x10 <sup>-21</sup> | 4.800 | 1.19x10 <sup>-20</sup> |
| 16 | ENSG00000150394 | <i>CDH8</i>    | 0.889                                        | 4.504       | 1.86x10 <sup>-21</sup> | 3.842 | 1.30x10 <sup>-20</sup> |
| 17 | ENSG00000171094 | <i>ALK</i>     | 0.786                                        | 3.503       | 4.51x10 <sup>-21</sup> | 3.874 | 3.07x10 <sup>-20</sup> |
| 18 | ENSG00000105642 | <i>KCNN1</i>   | 1.108                                        | 5.536       | 6.18x10 <sup>-21</sup> | 3.831 | 4.17x10 <sup>-20</sup> |
| 19 | ENSG00000165349 | <i>SLC7A3</i>  | 0.884                                        | 3.496       | 3.20x10 <sup>-20</sup> | 4.293 | 2.06x10 <sup>-19</sup> |
| 20 | ENSG00000164082 | <i>GRM2</i>    | 0.965                                        | 4.556       | 1.43x10 <sup>-19</sup> | 4.656 | 8.68x10 <sup>-19</sup> |
| 21 | ENSG00000165323 | <i>FAT3</i>    | 1.159                                        | 4.015       | 8.57x10 <sup>-19</sup> | 3.428 | 4.90x10 <sup>-18</sup> |
| 22 | ENSG00000137571 | <i>SLCO5A1</i> | 1.443                                        | 5.584       | 1.25x10 <sup>-17</sup> | 3.711 | 6.52x10 <sup>-17</sup> |
| 23 | ENSG00000136099 | <i>PCDH8</i>   | 1.039                                        | 5.516       | 1.94x10 <sup>-17</sup> | 5.092 | 9.97x10 <sup>-17</sup> |
| 24 | ENSG00000082684 | <i>SEMA5B</i>  | 1.871                                        | 3.667       | 4.35x10 <sup>-14</sup> | 2.835 | 1.73x10 <sup>-13</sup> |
| 25 | ENSG00000188389 | <i>PDCDI</i>   | 1.470                                        | 3.788       | 7.23x10 <sup>-14</sup> | 4.759 | 2.84x10 <sup>-13</sup> |
| 26 | ENSG00000105464 | <i>GRIN2D</i>  | 1.047                                        | 2.565       | 1.27x10 <sup>-13</sup> | 2.398 | 4.90x10 <sup>-13</sup> |
| 27 | ENSG00000006283 | <i>CACNA1G</i> | 1.268                                        | 4.556       | 1.83x10 <sup>-13</sup> | 2.817 | 6.97x10 <sup>-13</sup> |
| 28 | ENSG00000179242 | <i>CDH4</i>    | 1.624                                        | 3.814       | 1.90x10 <sup>-13</sup> | 3.319 | 7.23x10 <sup>-13</sup> |
| 29 | ENSG00000101188 | <i>NTSR1</i>   | 1.021                                        | 3.425       | 1.35x10 <sup>-12</sup> | 3.364 | 4.77x10 <sup>-12</sup> |
| 30 | ENSG00000187714 | <i>SLC18A3</i> | 0.635                                        | 3.950       | 1.53x10 <sup>-12</sup> | 4.537 | 5.39x10 <sup>-12</sup> |
| 31 | ENSG00000166828 | <i>SCNN1G</i>  | 1.629                                        | 6.549       | 2.67x10 <sup>-12</sup> | 4.077 | 9.27x10 <sup>-12</sup> |
| 32 | ENSG00000151012 | <i>SLC7A11</i> | 1.199                                        | 3.504       | 2.99x10 <sup>-12</sup> | 3.450 | 1.03x10 <sup>-11</sup> |
| 33 | ENSG00000117009 | <i>KMO</i>     | 1.306                                        | 4.949       | 3.15x10 <sup>-12</sup> | 3.036 | 1.09x10 <sup>-11</sup> |
| 34 | ENSG00000197410 | <i>DCHS2</i>   | 1.362                                        | 3.177       | 4.97x10 <sup>-12</sup> | 3.970 | 1.69x10 <sup>-11</sup> |
| 35 | ENSG00000090932 | <i>DLL3</i>    | 0.525                                        | 2.199       | 5.49x10 <sup>-12</sup> | 2.973 | 1.85x10 <sup>-11</sup> |
| 36 | ENSG00000157168 | <i>NRG1</i>    | 1.451                                        | 3.025       | 9.02x10 <sup>-12</sup> | 2.582 | 2.99x10 <sup>-11</sup> |

|    |                 |                 |       |       |                        |       |                        |
|----|-----------------|-----------------|-------|-------|------------------------|-------|------------------------|
| 37 | ENSG00000184986 | <i>TMEM121</i>  | 1.992 | 3.197 | 9.36x10 <sup>-12</sup> | 1.573 | 3.10x10 <sup>-11</sup> |
| 38 | ENSG00000119915 | <i>ELOVL3</i>   | 1.000 | 2.222 | 2.11x10 <sup>-11</sup> | 2.567 | 6.80x10 <sup>-11</sup> |
| 39 | ENSG00000121904 | <i>CSMD2</i>    | 0.646 | 2.116 | 3.53x10 <sup>-11</sup> | 3.021 | 1.11x10 <sup>-10</sup> |
| 40 | ENSG00000114646 | <i>CSPG5</i>    | 1.668 | 4.960 | 4.04x10 <sup>-11</sup> | 2.803 | 1.27x10 <sup>-10</sup> |
| 41 | ENSG00000147138 | <i>GPR174</i>   | 1.671 | 4.336 | 7.65x10 <sup>-11</sup> | 3.655 | 2.36x10 <sup>-10</sup> |
| 42 | ENSG00000125864 | <i>BFSP1</i>    | 1.806 | 2.878 | 1.78x10 <sup>-10</sup> | 1.407 | 5.31x10 <sup>-10</sup> |
| 43 | ENSG00000105376 | <i>ICAM5</i>    | 1.345 | 3.929 | 1.62x10 <sup>-09</sup> | 2.600 | 4.48x10 <sup>-09</sup> |
| 44 | ENSG00000142449 | <i>FBN3</i>     | 0.712 | 2.197 | 1.81x10 <sup>-09</sup> | 2.910 | 5.00x10 <sup>-09</sup> |
| 45 | ENSG00000089558 | <i>KCNH4</i>    | 0.666 | 2.015 | 2.66x10 <sup>-09</sup> | 2.718 | 7.23x10 <sup>-09</sup> |
| 46 | ENSG00000174482 | <i>LINGO2</i>   | 1.153 | 2.890 | 3.12x10 <sup>-09</sup> | 2.537 | 8.44x10 <sup>-09</sup> |
| 47 | ENSG00000116031 | <i>CD207</i>    | 1.156 | 2.358 | 9.43x10 <sup>-09</sup> | 1.828 | 2.44x10 <sup>-08</sup> |
| 48 | ENSG00000100346 | <i>CACNA1I</i>  | 0.825 | 2.618 | 1.24x10 <sup>-08</sup> | 2.902 | 3.17x10 <sup>-08</sup> |
| 49 | ENSG00000144339 | <i>TMEFF2</i>   | 1.704 | 4.144 | 1.58x10 <sup>-08</sup> | 2.547 | 4.02x10 <sup>-08</sup> |
| 50 | ENSG00000111981 | <i>ULBP1</i>    | 0.868 | 2.757 | 1.76x10 <sup>-08</sup> | 2.508 | 4.46x10 <sup>-08</sup> |
| 51 | ENSG00000108556 | <i>CHRNE</i>    | 1.368 | 2.307 | 4.98x10 <sup>-08</sup> | 1.574 | 1.21x10 <sup>-07</sup> |
| 52 | ENSG00000135119 | <i>RNFT2</i>    | 1.259 | 2.719 | 5.52x10 <sup>-08</sup> | 1.870 | 1.34x10 <sup>-07</sup> |
| 53 | ENSG00000168702 | <i>LRP1B</i>    | 1.182 | 2.572 | 7.63x10 <sup>-08</sup> | 2.249 | 1.83x10 <sup>-07</sup> |
| 54 | ENSG00000113763 | <i>UNC5A</i>    | 1.237 | 4.291 | 9.76x10 <sup>-08</sup> | 2.851 | 2.32x10 <sup>-07</sup> |
| 55 | ENSG00000167083 | <i>GNGT2</i>    | 1.952 | 3.060 | 1.14x10 <sup>-07</sup> | 1.573 | 2.69x10 <sup>-07</sup> |
| 56 | ENSG00000171462 | <i>DLK2</i>     | 1.687 | 2.938 | 2.38x10 <sup>-07</sup> | 1.150 | 5.46x10 <sup>-07</sup> |
| 57 | ENSG00000164220 | <i>F2RL2</i>    | 1.362 | 2.298 | 2.71x10 <sup>-07</sup> | 2.843 | 6.19x10 <sup>-07</sup> |
| 58 | ENSG00000128011 | <i>LRFN1</i>    | 1.652 | 2.759 | 3.84x10 <sup>-07</sup> | 1.363 | 8.67x10 <sup>-07</sup> |
| 59 | ENSG00000158089 | <i>GALNT14</i>  | 1.817 | 3.884 | 4.69x10 <sup>-07</sup> | 1.665 | 1.05x10 <sup>-06</sup> |
| 60 | ENSG00000183840 | <i>GPR39</i>    | 0.995 | 2.277 | 5.11x10 <sup>-07</sup> | 2.119 | 1.14x10 <sup>-06</sup> |
| 61 | ENSG00000185561 | <i>TLCD2</i>    | 1.835 | 2.776 | 6.40x10 <sup>-07</sup> | 1.014 | 1.42x10 <sup>-06</sup> |
| 62 | ENSG00000179603 | <i>GRM8</i>     | 1.043 | 2.301 | 6.54x10 <sup>-07</sup> | 2.000 | 1.45x10 <sup>-06</sup> |
| 63 | ENSG00000197406 | <i>DIO3</i>     | 1.418 | 2.245 | 6.72x10 <sup>-07</sup> | 3.528 | 1.48x10 <sup>-06</sup> |
| 64 | ENSG00000188517 | <i>COL25A1</i>  | 1.794 | 2.681 | 9.59x10 <sup>-07</sup> | 2.045 | 2.08x10 <sup>-06</sup> |
| 65 | ENSG00000139364 | <i>TMEM132B</i> | 1.338 | 2.808 | 1.00x10 <sup>-06</sup> | 2.504 | 2.17x10 <sup>-06</sup> |
| 66 | ENSG00000100427 | <i>MLC1</i>     | 1.621 | 5.647 | 1.50x10 <sup>-06</sup> | 2.159 | 3.20x10 <sup>-06</sup> |
| 67 | ENSG00000133107 | <i>TRPC4</i>    | 1.815 | 2.939 | 2.55x10 <sup>-06</sup> | 2.039 | 5.34x10 <sup>-06</sup> |
| 68 | ENSG00000183780 | <i>SLC35F3</i>  | 1.435 | 3.099 | 3.54x10 <sup>-06</sup> | 2.185 | 7.34x10 <sup>-06</sup> |
| 69 | ENSG00000149571 | <i>KIRREL3</i>  | 1.450 | 2.878 | 4.71x10 <sup>-06</sup> | 2.041 | 9.67x10 <sup>-06</sup> |
| 70 | ENSG00000125510 | <i>OPRL1</i>    | 1.919 | 3.087 | 5.11x10 <sup>-06</sup> | 1.136 | 1.05x10 <sup>-05</sup> |
| 71 | ENSG00000134207 | <i>SYT6</i>     | 1.040 | 2.048 | 5.37x10 <sup>-06</sup> | 2.506 | 1.10x10 <sup>-05</sup> |
| 72 | ENSG00000198400 | <i>NTRK1</i>    | 1.592 | 2.408 | 6.56x10 <sup>-06</sup> | 1.767 | 1.33x10 <sup>-05</sup> |
| 73 | ENSG00000125657 | <i>TNFSF9</i>   | 1.885 | 3.521 | 8.36x10 <sup>-06</sup> | 1.294 | 1.68x10 <sup>-05</sup> |
| 74 | ENSG00000007129 | <i>CEACAM21</i> | 1.723 | 2.566 | 1.10x10 <sup>-05</sup> | 1.866 | 2.19x10 <sup>-05</sup> |
| 75 | ENSG00000156564 | <i>LRFN2</i>    | 0.881 | 2.233 | 2.26x10 <sup>-05</sup> | 1.901 | 4.36x10 <sup>-05</sup> |
| 76 | ENSG00000072041 | <i>SLC6A15</i>  | 1.031 | 2.693 | 0.00013                | 2.684 | 0.00023                |

|    |                 |                |       |       |         |       |         |
|----|-----------------|----------------|-------|-------|---------|-------|---------|
| 77 | ENSG00000185008 | <i>ROBO2</i>   | 1.718 | 2.706 | 0.00015 | 1.452 | 0.00027 |
| 78 | ENSG00000121871 | <i>SLITRK3</i> | 1.400 | 2.775 | 0.00016 | 1.836 | 0.00028 |
| 79 | ENSG00000196990 | <i>FAM163B</i> | 0.938 | 2.533 | 0.00017 | 2.420 | 0.00029 |
| 80 | ENSG00000176956 | <i>LY6H</i>    | 1.681 | 3.618 | 0.00022 | 2.039 | 0.00038 |
| 81 | ENSG00000171864 | <i>PRND</i>    | 0.953 | 3.537 | 0.00023 | 2.071 | 0.00041 |
| 82 | ENSG00000196811 | <i>CHRNA9</i>  | 0.536 | 2.093 | 0.00025 | 1.760 | 0.00043 |
| 83 | ENSG00000095970 | <i>TREM2</i>   | 1.712 | 2.445 | 0.00044 | 2.051 | 0.00076 |
| 84 | ENSG00000237515 | <i>SHISA9</i>  | 1.303 | 2.426 | 0.00078 | 1.675 | 0.00129 |
| 85 | ENSG00000148848 | <i>ADAM12</i>  | 1.328 | 2.091 | 0.00124 | 1.490 | 0.00202 |
| 86 | ENSG00000184845 | <i>DRD1</i>    | 1.397 | 2.093 | 0.00152 | 1.461 | 0.00244 |
| 87 | ENSG00000120088 | <i>CRHR1</i>   | 0.610 | 2.061 | 0.00252 | 1.571 | 0.00395 |
| 88 | ENSG00000086548 | <i>CEACAM6</i> | 1.106 | 2.742 | 0.00270 | 2.118 | 0.00421 |
| 89 | ENSG00000145428 | <i>RNF175</i>  | 1.532 | 2.264 | 0.00365 | 1.191 | 0.00561 |
| 90 | ENSG00000145242 | <i>EPHA5</i>   | 1.154 | 2.161 | 0.00510 | 1.210 | 0.00771 |
| 91 | ENSG00000142408 | <i>CACNG8</i>  | 0.903 | 3.026 | 0.00740 | 1.199 | 0.01096 |

(\*) p-values were calculated using EdgeR. Statistical test was two-sided.

**Supplementary Table 2. Expression of *PAPPA* in TCGA tumor and matched normal tissue samples.**

| Abbr. | Description                                                         | TUMOR SAMPLES |              |                   |      |                              |                  |
|-------|---------------------------------------------------------------------|---------------|--------------|-------------------|------|------------------------------|------------------|
|       |                                                                     | total<br>(n=) | n.d.<br>(n=) | mean<br>log2[TPM] | SD   | samples (n=)<br>log2[TPM] >2 | %<br>log2[TPM]>2 |
| ACC   | ADRENOCORTICAL CARCINOMA                                            | 77            | 5            | -3.81             | 2.21 | 0                            | 0                |
| BLCA  | BLADDER UROTHELIAL CARCINOMA                                        | 503           | 4            | -2.12             | 1.95 | 10                           | 2                |
| BRCA  | BREAST INVASIVE CARCINOMA                                           | 1139          | 0            | -1.39             | 1.46 | 11                           | 1                |
| CESC  | CERVICAL SQUAMOUS CELL CARCINOMA AND<br>ENDOCERVICAL ADENOCARCINOMA | 306           | 4            | -2.57             | 1.93 | 5                            | 2                |
| CHOL  | CHOLANGIOCARCINOMA                                                  | 36            | 0            | -1.69             | 2.02 | 0                            | 0                |
| COAD  | COLON ADENOCARCINOMA                                                | 311           | 0            | -1.57             | 1.57 | 2                            | 1                |
| DLBC  | LYMPHOID NEOPLASM DIFFUSE LARGE B-CELL<br>LYMPHOMA                  | 47            | 4            | -4.12             | 1.89 | 0                            | 0                |
| ESCA  | ESOPHAGEAL CARCINOMA                                                | 182           | 0            | 0.81              | 1.48 | 32                           | 18               |
| GBM   | GLIOBLASTOMA MULTIFORME                                             | 168           | 2            | -2.64             | 1.78 | 1                            | 1                |
| HNSC  | HEAD AND NECK SQUAMOUS CELL CARCINOMA                               | 520           | 0            | 0.07              | 1.66 | 60                           | 12               |
| KICH  | KIDNEY CHROMOPHOBE                                                  | 66            | 0            | -2.49             | 1.53 | 1                            | 2                |
| KIRC  | KIDNEY RENAL CLEAR CELL CARCINOMA                                   | 543           | 0            | -1.31             | 1.62 | 13                           | 2                |
| KIRP  | KIDNEY RENAL PAPILLARY CELL CARCINOMA                               | 289           | 0            | 1.29              | 1.69 | 90                           | 31               |
| LAML  | ACUTE MYELOID LEUKEMIA                                              | 173           | 15           | -3.39             | 1.93 | 1                            | 1                |
| LGG   | BRAIN LOWER GRADE GLIOMA                                            | 527           | 1            | -1.94             | 1.59 | 4                            | 1                |
| LIHC  | LIVER HEPATOCELLULAR CARCINOMA                                      | 372           | 43           | -4.10             | 1.73 | 0                            | 0                |
| LUAD  | LUNG ADENOCARCINOMA                                                 | 539           | 1            | -1.23             | 1.85 | 25                           | 5                |
| LUSC  | LUNG SQUAMOUS CELL CARCINOMA                                        | 500           | 0            | -1.16             | 1.80 | 18                           | 4                |
| MESO  | MESOTHELIOMA                                                        | 87            | 0            | 0.18              | 1.70 | 11                           | 13               |
| OV    | OVARIAN SEROUS CYSTADENOCARCINOMA                                   | 428           | 11           | -3.17             | 1.79 | 1                            | 0                |
| PAAD  | PANCREATIC ADENOCARCINOMA                                           | 179           | 0            | -0.11             | 1.42 | 6                            | 3                |
| PCPG  | PHEOCHROMOCYTOMA AND PARAGANGLIOMA                                  | 182           | 0            | -0.85             | 1.66 | 11                           | 6                |
| PRAD  | PROSTATE ADENOCARCINOMA                                             | 504           | 2            | -2.31             | 1.30 | 2                            | 0                |
| READ  | RECTUM ADENOCARCINOMA                                               | 93            | 0            | -1.48             | 1.43 | 0                            | 0                |
| SARC  | SARCOMA                                                             | 262           | 2            | 0.03              | 2.31 | 52                           | 20               |
| SKCM  | SKIN CUTANEOUS MELANOMA                                             | 469           | 6            | -3.12             | 2.03 | 12                           | 3                |
| STAD  | STOMACH ADENOCARCINOMA                                              | 415           | 0            | 0.22              | 1.33 | 33                           | 8                |
| TGCT  | TESTICULAR GERM CELL TUMORS                                         | 154           | 4            | -2.57             | 1.91 | 0                            | 0                |
| THCA  | THYROID CARCINOMA                                                   | 512           | 0            | -1.23             | 1.61 | 7                            | 1                |
| THYM  | THYMOMA                                                             | 119           | 3            | -2.23             | 1.94 | 2                            | 2                |
| UCEC  | UTERINE CORPUS ENDOMETRIOID CARCINOMA                               | 185           | 9            | -3.10             | 1.82 | 0                            | 0                |
| UCS   | UTERINE CARCINOSARCOMA                                              | 57            | 1            | -2.54             | 1.67 | 0                            | 0                |
| UVM   | UVEAL MELANOMA                                                      | 79            | 6            | -3.65             | 1.63 | 0                            | 0                |

| Abbr. | Description                                                         | MATCHED NORMAL TISSUE SAMPLES |              |                   |      |                              |                   |
|-------|---------------------------------------------------------------------|-------------------------------|--------------|-------------------|------|------------------------------|-------------------|
|       |                                                                     | total<br>(n=)                 | n.d.<br>(n=) | mean<br>log2[TPM] | SD   | samples (n=)<br>log2[TPM] >2 | %<br>log2[TPM] >2 |
| ACC   | ADRENOCORTICAL CARCINOMA                                            | n.a.                          | n.a.         | n.a.              |      | n.a.                         | n.a.              |
| BLCA  | BLADDER UROTHELIAL CARCINOMA                                        | 19                            | 0            | -0.55             | 1.48 | 1                            | 5                 |
| BRCA  | BREAST INVASIVE CARCINOMA                                           | 114                           | 0            | -0.79             | 0.95 | 0                            | 0                 |
| CESC  | CERVICAL SQUAMOUS CELL CARCINOMA AND<br>ENDOCERVICAL ADENOCARCINOMA | 3                             | 0            | 0.40              | 1.36 | 0                            | 0                 |
| CHOL  | CHOLANGIOCARCINOMA                                                  | 9                             | 0            | -4.68             | 1.49 | 0                            | 0                 |
| COAD  | COLON ADENOCARCINOMA                                                | 41                            | 0            | -1.29             | 0.84 | 0                            | 0                 |
| DLBC  | LYMPHOID NEOPLASM DIFFUSE LARGE B-CELL<br>LYMPHOMA                  | n.a.                          | n.a.         | n.a.              | n.a. | n.a.                         | n.a.              |
| ESCA  | ESOPHAGEAL CARCINOMA                                                | 13                            | 0            | -0.07             | 1.17 | 1                            | 8                 |
| GBM   | GLIOBLASTOMA MULTIFORME                                             | 5                             | 0            | -2.95             | 1.85 | 0                            | 0                 |
| HNSC  | HEAD AND NECK SQUAMOUS CELL CARCINOMA                               | 44                            | 0            | -0.60             | 1.84 | 1                            | 2                 |
| KICH  | KIDNEY CHROMOPHOBE                                                  | 25                            | 0            | 2.44              | 0.98 | 17                           | 68                |
| KIRC  | KIDNEY RENAL CLEAR CELL CARCINOMA                                   | 72                            | 0            | 2.66              | 0.97 | 54                           | 75                |
| KIRP  | KIDNEY RENAL PAPILLARY CELL CARCINOMA                               | 32                            | 0            | 2.31              | 0.77 | 22                           | 69                |
| LAML  | ACUTE MYELOID LEUKEMIA                                              | n.a.                          | n.a.         | n.a.              | n.a. | n.a.                         | n.a.              |
| LGG   | BRAIN LOWER GRADE GLIOMA                                            | n.a.                          | n.a.         | n.a.              | n.a. | n.a.                         | n.a.              |
| LIHC  | LIVER HEPATOCELLULAR CARCINOMA                                      | 50                            | 2            | -4.31             | 1.18 | 0                            | 0                 |
| LUAD  | LUNG ADENOCARCINOMA                                                 | 59                            | 0            | -1.20             | 0.82 | 0                            | 0                 |
| LUSC  | LUNG SQUAMOUS CELL CARCINOMA                                        | 50                            | 0            | -0.70             | 1.03 | 1                            | 2                 |
| MESO  | MESOTHELIOMA                                                        | n.a.                          | n.a.         | n.a.              | n.a. | n.a.                         | n.a.              |
| OV    | OVARIAN SEROUS CYSTADENOCARCINOMA                                   | n.a.                          | n.a.         | n.a.              | n.a. | n.a.                         | n.a.              |
| PAAD  | PANCREATIC ADENOCARCINOMA                                           | 4                             | 0            | 0.07              | 0.57 | 0                            | 0                 |
| PCPG  | PHEOCHROMOCYTOMA AND PARAGANGLIOMA                                  | 3                             | 0            | -1.44             | 1.24 | 0                            | 0                 |
| PRAD  | PROSTATE ADENOCARCINOMA                                             | 52                            | 0            | -1.20             | 1.13 | 0                            | 0                 |
| READ  | RECTUM ADENOCARCINOMA                                               | 10                            | 0            | -1.51             | 1.21 | 0                            | 0                 |
| SARC  | SARCOMA                                                             | 2                             | 0            | -0.39             | 4.37 | 1                            | n.a.              |
| SKCM  | SKIN CUTANEOUS MELANOMA                                             | 1                             | 0            | -1.43             | n.a. | 0                            | n.a.              |
| STAD  | STOMACH ADENOCARCINOMA                                              | 36                            | 0            | -0.22             | 0.98 | 0                            | 0                 |
| TGCT  | TESTICULAR GERM CELL TUMORS                                         | n.a.                          | n.a.         | n.a.              | n.a. | n.a.                         | n.a.              |
| THCA  | THYROID CARCINOMA                                                   | 59                            | 0            | -1.65             | 1.04 | 0                            | 0                 |
| THYM  | THYMOMA                                                             | 2                             | 0            | -0.21             | 1.28 | 0                            | n.a.              |
| UCEC  | UTERINE CORPUS ENDOMETRIOID CARCINOMA                               | 23                            | 0            | 0.56              | 1.18 | 2                            | 9                 |
| UCS   | UTERINE CARCINOSARCOMA                                              | n.a.                          | n.a.         | n.a.              | n.a. | n.a.                         | n.a.              |
| UVM   | UVEAL MELANOMA                                                      | n.a.                          | n.a.         | n.a.              | n.a. | n.a.                         | n.a.              |



**Supplementary Table 3. Characteristics of patients analyzed for PAPP-A levels.**

| Group            | demographics |           |            | sample type |        |       | PAPP-A ( $\mu$ IU/mL) |        |            |
|------------------|--------------|-----------|------------|-------------|--------|-------|-----------------------|--------|------------|
|                  | F/M          | age range | median age | serum       | plasma | total | range (min-max)       | median | p-val. (*) |
| EWS patients     | 19/37        | 7-40      | 19         | 7           | 49     | 56    | 0.12 - 126.48         | 1.94   | n.a.       |
| CTRL donors      | 20/34        | 18-30     | 25         | 6           | 47     | 53    | 0.04 - 3.99           | 1.37   | 0.01       |
| Non-EWS patients | 5/8          | 5-32      | 17         | 9           | 4      | 13    | 0.56 - 4.62           | 1.40   | 0.04       |

(\*) p-value indicates level of significance of the EWS group compared to the other groups according to two-sided Wilcoxon–Mann–Whitney test.

n.a.: not applicable

**Supplementary Table 4. Statistics of GSEA analysis of hallmark pathways enriched in EW8.PAPPA.KO compared to EW8.PAPPA.CTRL**

|                                 | SIZE | ES     | NES    | NOM       | FDR   | FWER  | RANK   |
|---------------------------------|------|--------|--------|-----------|-------|-------|--------|
| HALLMARK PATHWAY NAME           |      |        |        | p-val (*) | q-val | p-val | AT MAX |
| INTERFERON_ALPHA_RESPONSE       | 92   | 0.656  | 2.329  | >0.001    | 0.000 | 0.000 | 5767   |
| HYPOXIA                         | 195  | 0.518  | 2.033  | >0.001    | 0.000 | 0.000 | 6645   |
| INTERFERON_GAMMA_RESPONSE       | 189  | 0.504  | 1.972  | >0.001    | 0.000 | 0.000 | 7924   |
| TNFA_SIGNALING_VIA_NFKB         | 196  | 0.452  | 1.784  | >0.001    | 0.001 | 0.004 | 7183   |
| INFLAMMATORY_RESPONSE           | 190  | 0.445  | 1.747  | >0.001    | 0.001 | 0.008 | 6962   |
| KRAS_SIGNALING_DN               | 183  | 0.426  | 1.685  | >0.001    | 0.002 | 0.018 | 5812   |
| APICAL_SURFACE                  | 44   | 0.514  | 1.652  | 0.001     | 0.004 | 0.031 | 4868   |
| IL6_JAK_STAT3_SIGNALING         | 85   | 0.460  | 1.641  | >0.001    | 0.004 | 0.038 | 6653   |
| P53_PATHWAY                     | 199  | 0.410  | 1.606  | >0.001    | 0.006 | 0.063 | 6270   |
| COAGULATION                     | 130  | 0.396  | 1.481  | 0.006     | 0.026 | 0.275 | 7946   |
| BILE_ACID_METABOLISM            | 107  | 0.397  | 1.459  | 0.006     | 0.030 | 0.334 | 7311   |
| HEME_METABOLISM                 | 191  | 0.366  | 1.444  | 0.002     | 0.032 | 0.375 | 6607   |
| KRAS_SIGNALING_UP               | 193  | 0.357  | 1.403  | 0.005     | 0.045 | 0.515 | 6407   |
| ALLOGRAFT_REJECTION             | 183  | 0.357  | 1.396  | 0.005     | 0.046 | 0.557 | 6145   |
| MYOGENESIS                      | 197  | 0.354  | 1.394  | 0.005     | 0.044 | 0.561 | 7632   |
| IL2_STAT5_SIGNALING             | 198  | 0.345  | 1.368  | 0.008     | 0.054 | 0.663 | 6546   |
| APOPTOSIS                       | 158  | 0.351  | 1.354  | 0.02      | 0.059 | 0.716 | 5233   |
| COMPLEMENT                      | 192  | 0.337  | 1.326  | 0.03      | 0.073 | 0.803 | 7007   |
| E2F_TARGETS                     | 199  | -0.691 | -3.249 | >0.001    | 0.000 | 0.000 | 4814   |
| MYC_TARGETS_V1                  | 199  | -0.653 | -3.066 | >0.001    | 0.000 | 0.000 | 4359   |
| G2M_CHECKPOINT                  | 198  | -0.650 | -3.031 | >0.001    | 0.000 | 0.000 | 5126   |
| MYC_TARGETS_V2                  | 58   | -0.718 | -2.795 | >0.001    | 0.000 | 0.000 | 3493   |
| MTORC1_SIGNALING                | 198  | -0.478 | -2.249 | >0.001    | 0.000 | 0.000 | 4410   |
| UNFOLDED_PROTEIN_RESPONSE       | 110  | -0.490 | -2.098 | >0.001    | 0.000 | 0.000 | 5886   |
| MITOTIC_SPINDLE                 | 198  | -0.377 | -1.765 | >0.001    | 0.001 | 0.004 | 6852   |
| DNA_REPAIR                      | 143  | -0.343 | -1.546 | >0.001    | 0.011 | 0.045 | 5990   |
| UV_RESPONSE_UP                  | 153  | -0.309 | -1.384 | >0.001    | 0.038 | 0.166 | 4859   |
| PI3K_AKT_MTOR_SIGNALING         | 105  | -0.320 | -1.363 | 0.02      | 0.038 | 0.197 | 5430   |
| REACTIVE_OXIGEN_SPECIES_PATHWAY | 47   | -0.375 | -1.369 | 0.04      | 0.038 | 0.182 | 3529   |

(\*) nominal p-values were calculated using GSEA software, which is based on a two-sided permutation-based Kolmogorov-Smirnov-like test

**Supplementary Table 5. Statistics of GSEA analysis of hallmark pathways in primary EWS tumors in in-house generated dataset and GEO dataset GSE34620**

| <b>DATA SET</b>      | <b>HALLMARK PATHWAY NAME</b> | <b>SIZE</b> | <b>ES</b> | <b>NES</b> | <b>NOM p-val (*)</b> | <b>FDR q-val</b> | <b>FWER p-val</b> | <b>RANK AT MAX</b> |
|----------------------|------------------------------|-------------|-----------|------------|----------------------|------------------|-------------------|--------------------|
| in-house generated   | ALLOGRAFT_REJECTION          | 200         | 0.411     | 2.379      | <0.001               | <0.0001          | <0.0001           | 4078               |
|                      | INFLAMMATORY_RESPONSE        | 197         | 0.374     | 2.081      | <0.001               | <0.0001          | <0.0001           | 4396               |
|                      | IL6_JAK_STAT3_SIGNALING      | 87          | 0.419     | 2.018      | <0.001               | <0.0001          | <0.0001           | 3956               |
|                      | COMPLEMENT                   | 195         | 0.354     | 1.979      | <0.001               | <0.0001          | <0.0001           | 3333               |
|                      | TNFA_SIGNALING_VIA_NFKB      | 198         | 0.298     | 1.649      | <0.001               | 0.01             | 0.03              | 4310               |
|                      | INTERFERON_GAMMA_RESPONSE    | 197         | 0.241     | 1.361      | <0.001               | 0.05             | 0.22              | 3211               |
| GEO dataset GSE34620 | ALLOGRAFT_REJECTION          | 192         | 0.702     | 2.361      | <0.001               | <0.0001          | <0.0001           | 2156               |
|                      | INFLAMMATORY_RESPONSE        | 187         | 0.682     | 2.291      | <0.001               | <0.0001          | <0.0001           | 2666               |
|                      | INTERFERON_GAMMA_RESPONSE    | 188         | 0.663     | 2.240      | <0.001               | <0.0001          | <0.0001           | 4063               |
|                      | COMPLEMENT                   | 185         | 0.662     | 2.232      | <0.001               | <0.0001          | <0.0001           | 2900               |
|                      | IL6_JAK_STAT3_SIGNALING      | 86          | 0.716     | 2.200      | <0.001               | <0.0001          | <0.0001           | 2270               |
|                      | TNFA_SIGNALING_VIA_NFKB      | 190         | 0.608     | 2.053      | <0.001               | <0.0001          | <0.0001           | 3328               |
|                      | APOPTOSIS                    | 156         | 0.586     | 1.933      | <0.001               | <0.0001          | <0.0001           | 3345               |
|                      | INTERFERON_ALPHA_RESPONSE    | 87          | 0.563     | 1.743      | <0.001               | <0.0001          | 0.003             | 3231               |

(\*) nominal p-values were calculated using GSEA software, which is based on a two-sided permutation-based Kolmogorov-Smirnov-like test

# Supplementary Figure 1

**A**

## PAPP-A normal tissue expression (RNA-seq)

(data source: Suppl. Tissue based-map of the human proteome, Science 2015)

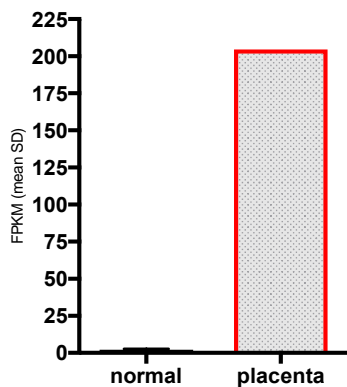

**B**

## PAPP-A gene expression value (z-score)

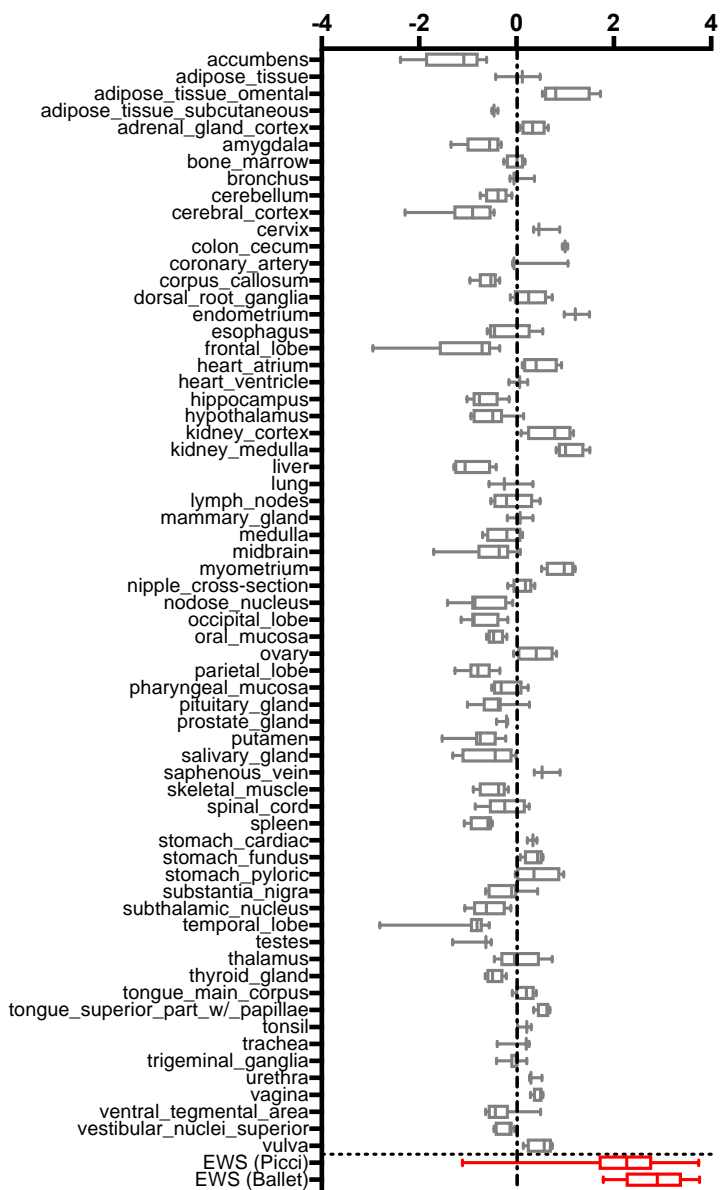

C

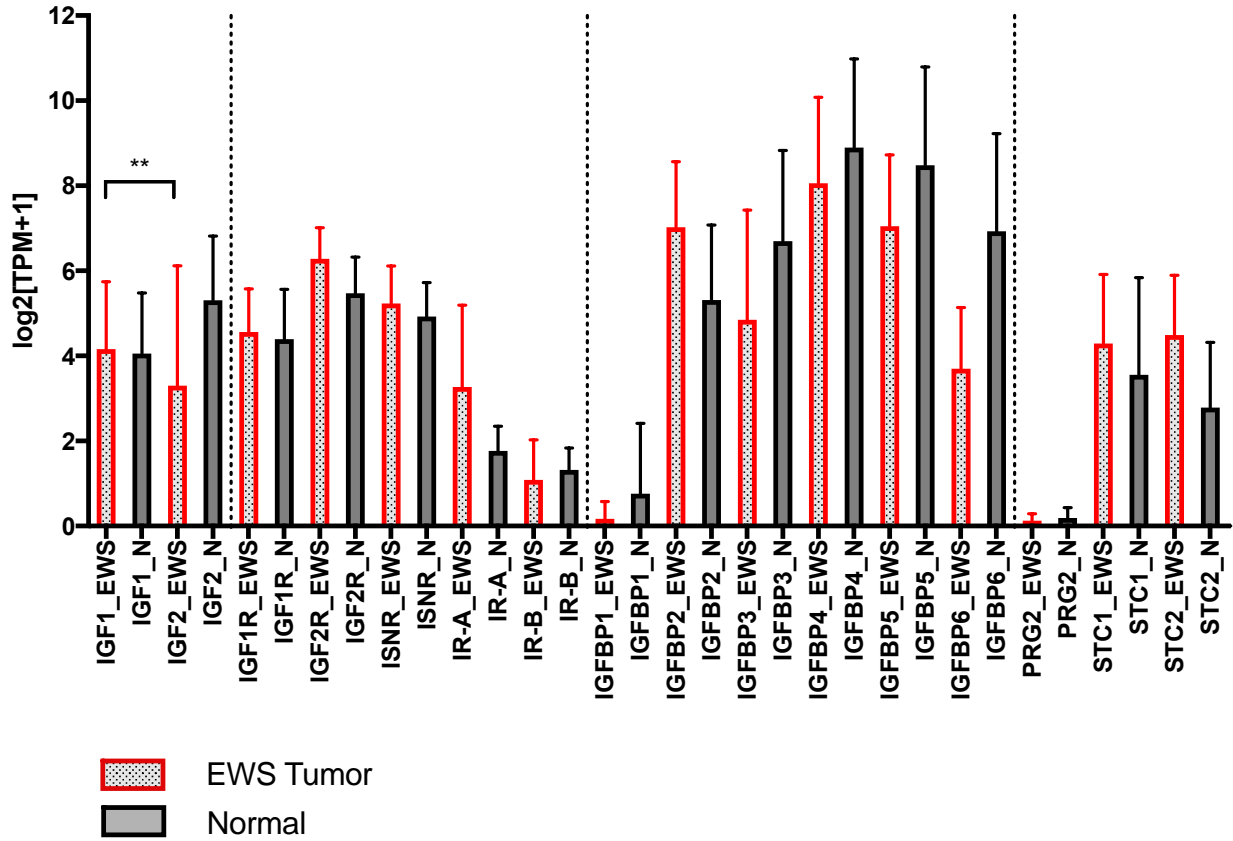

D

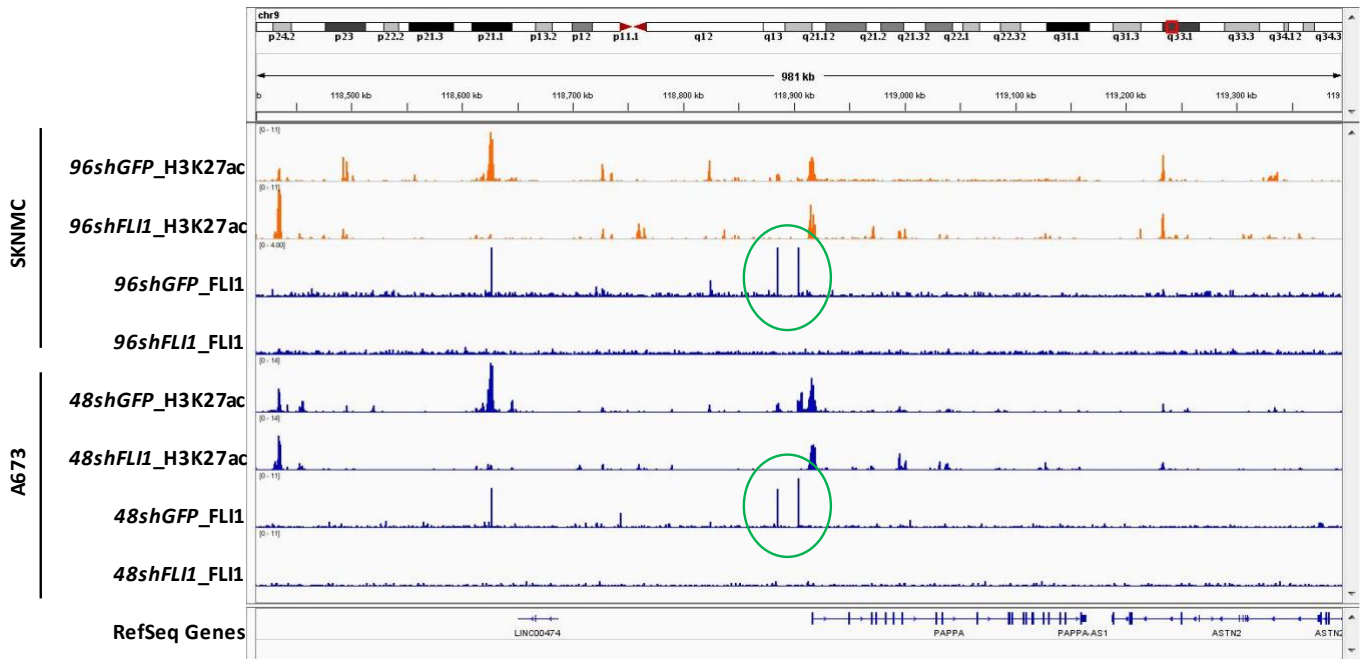

**E**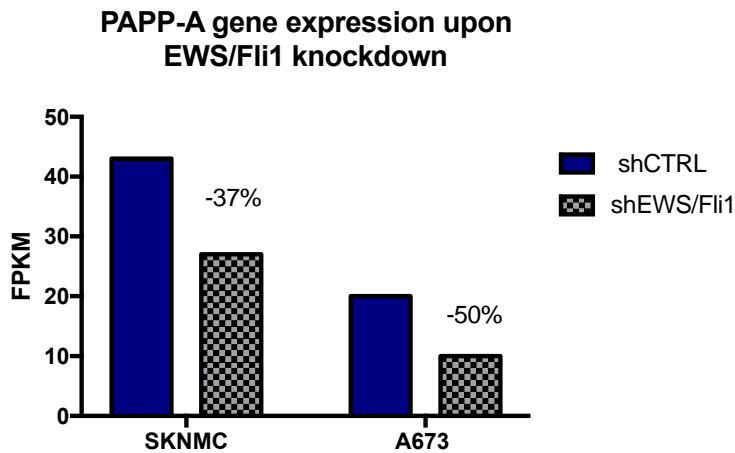

**Supplementary Figure 1. Expression of *PAPPA* in the placenta, normal tissues and EWS, expression of genes involved in autocrine IGF signaling loop and role of EWS-Fli1 on *PAPPA* expression**

(A) Tissue-enhanced FPKM expression values of *PAPPA* in the placenta (n=1) compared to normal tissue samples (n=31 tissues) according to RNAseq data queried from the Human Protein Atlas [2]. (B) Differential expression of *PAPPA* in EWS compared to normal tissue in 2 Affymetrix datasets derived from the Pediatric cBioPortal for Integrated Childhood Cancer Genomics (Picci et.al, n=37, GSE12102 and Ballet et.al, n=19, GSE37371), values represent z-scores. (C) Gene expression of *IGF/PAPPA* related genes according to in-house generated RNAseq dataset in Normal Tissue (n=42) and EWS (n=120) samples. Values represent  $\log_2[\text{TPM}+1] \pm \text{SD}$ . (D) ChIP-seq data queried from Riggi et. al [6] show direct EWS-Fli1 binding site in the putative *PAPPA* promoter identified in A673 and SKNMC cell lines. (E) Gene expression of *PAPPA* (RNAseq) upon shRNA silencing of EWS-Fli1 in both cell lines according to Riggi et.al. Values represent FPKM.

# Supplementary Figure 2

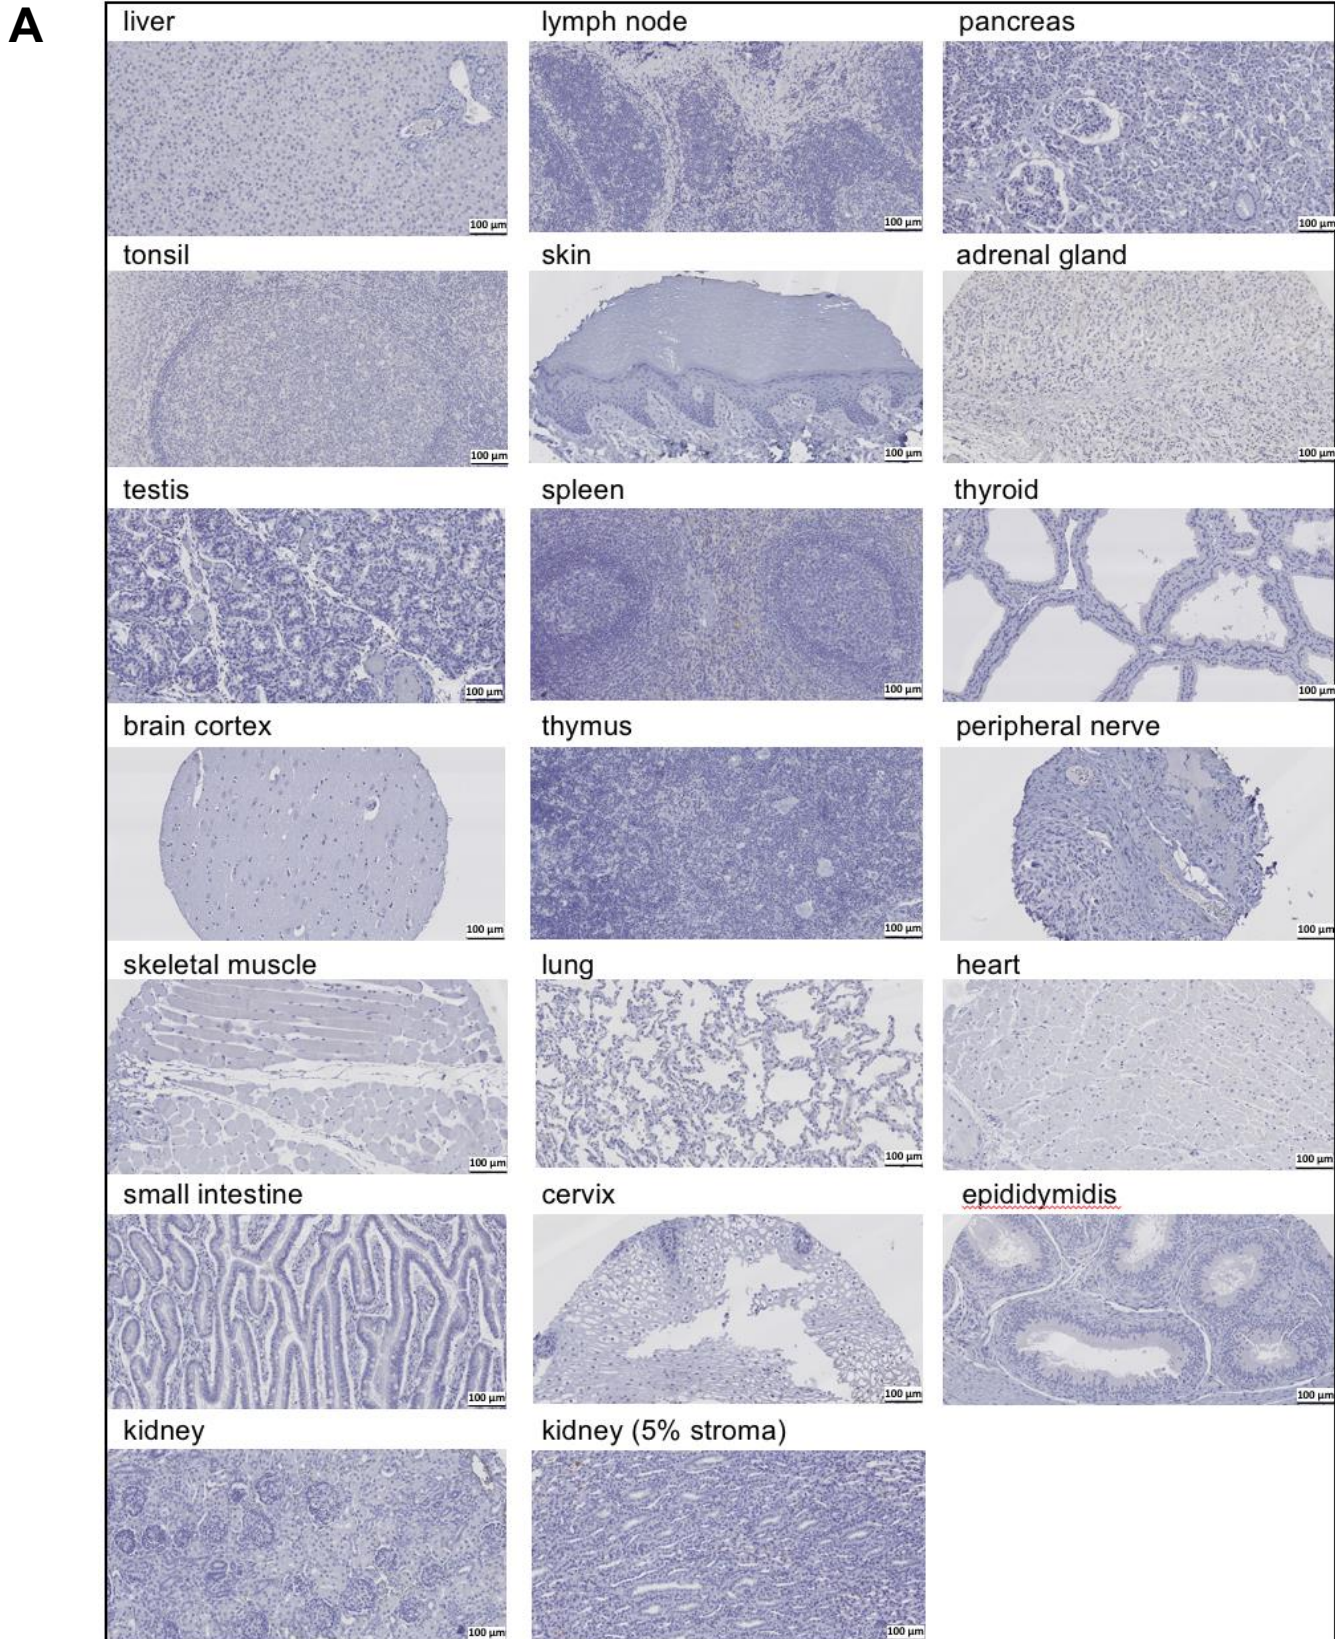

**B**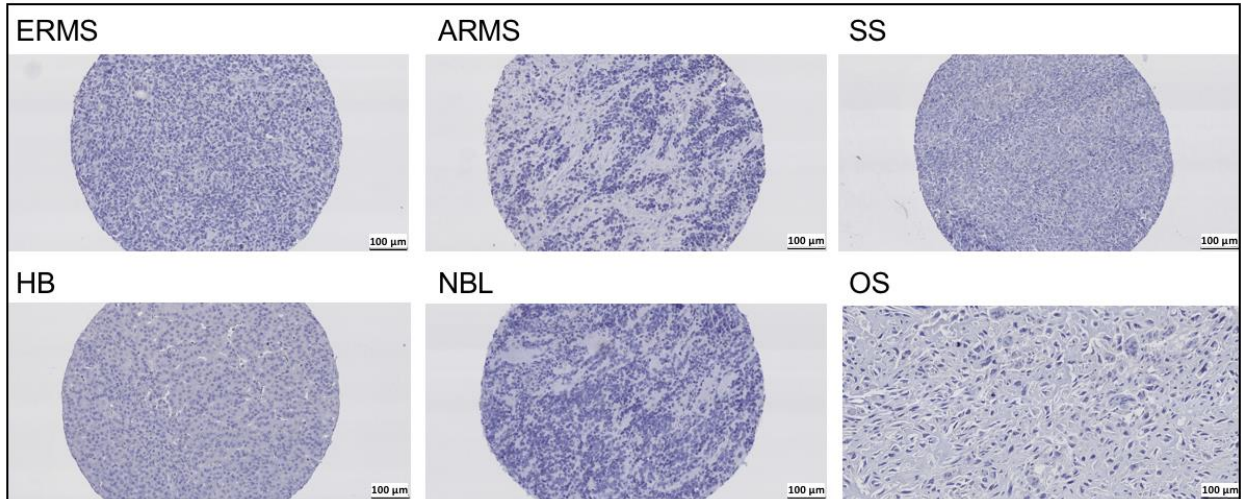**C**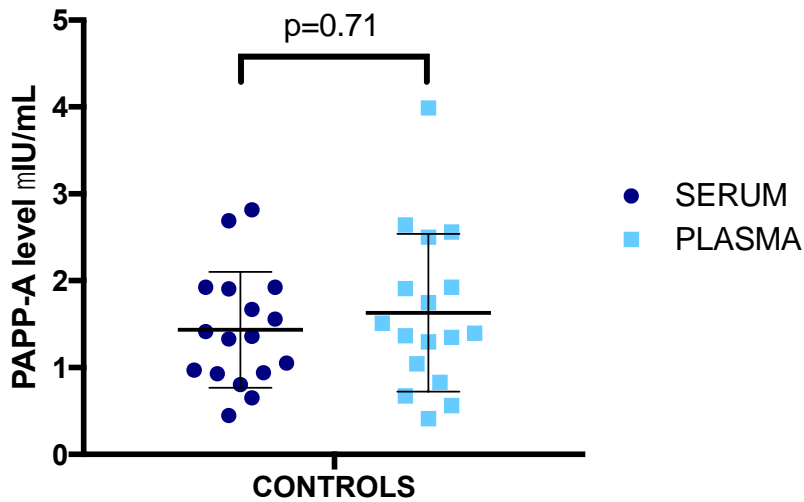

**Supplementary Figure 2. PAPP-A tissue expression in pediatric solid tumors and normal tissue and circulating PAPP-A levels in serum compared to plasma.**

(A) Representative images of absent PAPP-A staining of pediatric solid tumor TMA's and

(B) normal tissue TMA's. Scale bars represent 100  $\mu$ m. PAPP-A IHC staining (ABS 006-01,

Thermo Fisher) was performed on the Venatana Discovery XT automated stainer. (C) Simultaneous

measurement of PAPP-A serum and plasma levels of normal control donors (n=17) from the same

blood draw using picoPAPP-A (AL-101) ELISA kits from AnshLabs (Webster, TX). Values

represent mean $\pm$ SD, p-value according to two-sided Wilcoxon Mann-Whitney U test.





**C**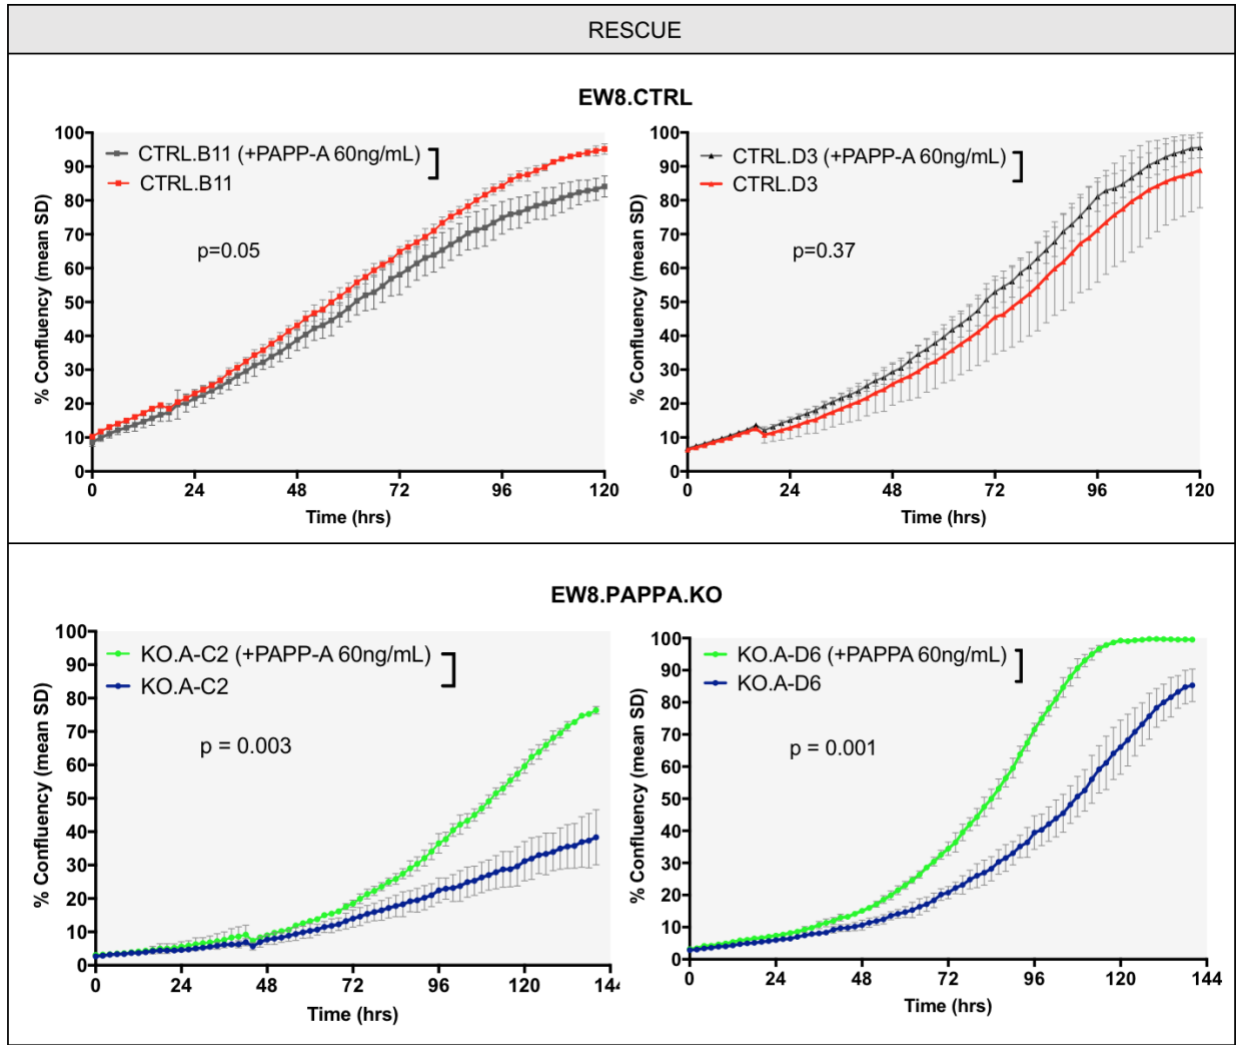

**D**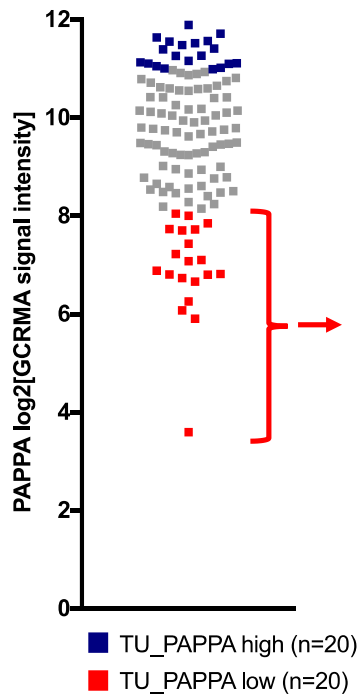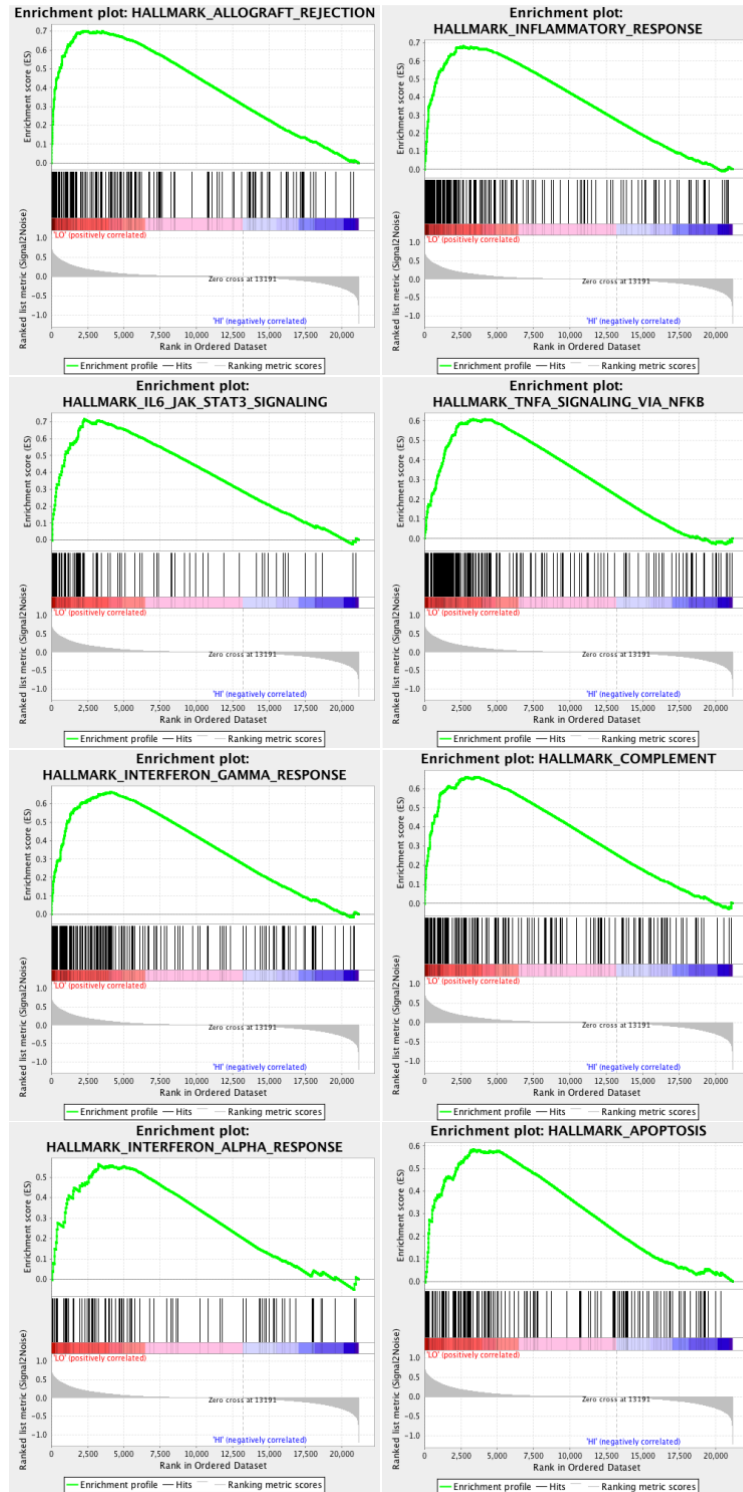

**Supplementary Figure 3. Proteolytic activity of native EW8 and EW8.PAPPA.KO/CTRL cell lines towards 125I-IGFBP-5, role of PAPPA.KO on growth of EWS cell lines ex vivo and effect of diminished *PAPPA* expression on enrichment of immune response hallmark pathways** (A) Cell culture supernatant (24hrs) of native EW8 cells and EW8.PAPP-A.KO or CTRL.B9 cell lines incubated with either polyclonal rabbit anti-PAPP-A or irrelevant polyclonal rabbit IgG and assessed for proteolysis towards 10nM radiolabeled IGFBP5. Cleavage reactions was stopped at 60 minutes and cleaved IGFBP5 was separated from intact by non-reducing SDS-PAGE. (B) Growth of individual EW8 CTRL clones (n=3) and EW8.PAPPA.KO clones (n=6) over time as measured by confluency in an IncuCyte ZOOM Live Cell Analysis System. (C) Growth of individual EW8 CTRL and EW8.PAPPA.KO clones upon culture +/- 60ng/mL soluble PAPP-A. All clones were plated in triplicates/representative of three individual experiments is shown. Values represent %confluency (mean±SD), p=value for effect of treatment condition according to 2-way RM-ANOVA. (D) Gene set enrichment analysis (GSEA) against the Molecular Signatures Database Hallmark Gene Set Collection of the GEO dataset GSE34620 (Delattre et. al.) showing enriched pathways in *PAPPA*-low (n=20) compared to *PAPPA*-high (n=20) tumors.
